# Supplementary material
Source: Springer Nature journal article supplement (https://www.springermedizin.de/resource/supplementary/12891_2014_2374_MOESM1_ESM.pdf/9509860)
Supplement: MOESM1 [file 9509860]

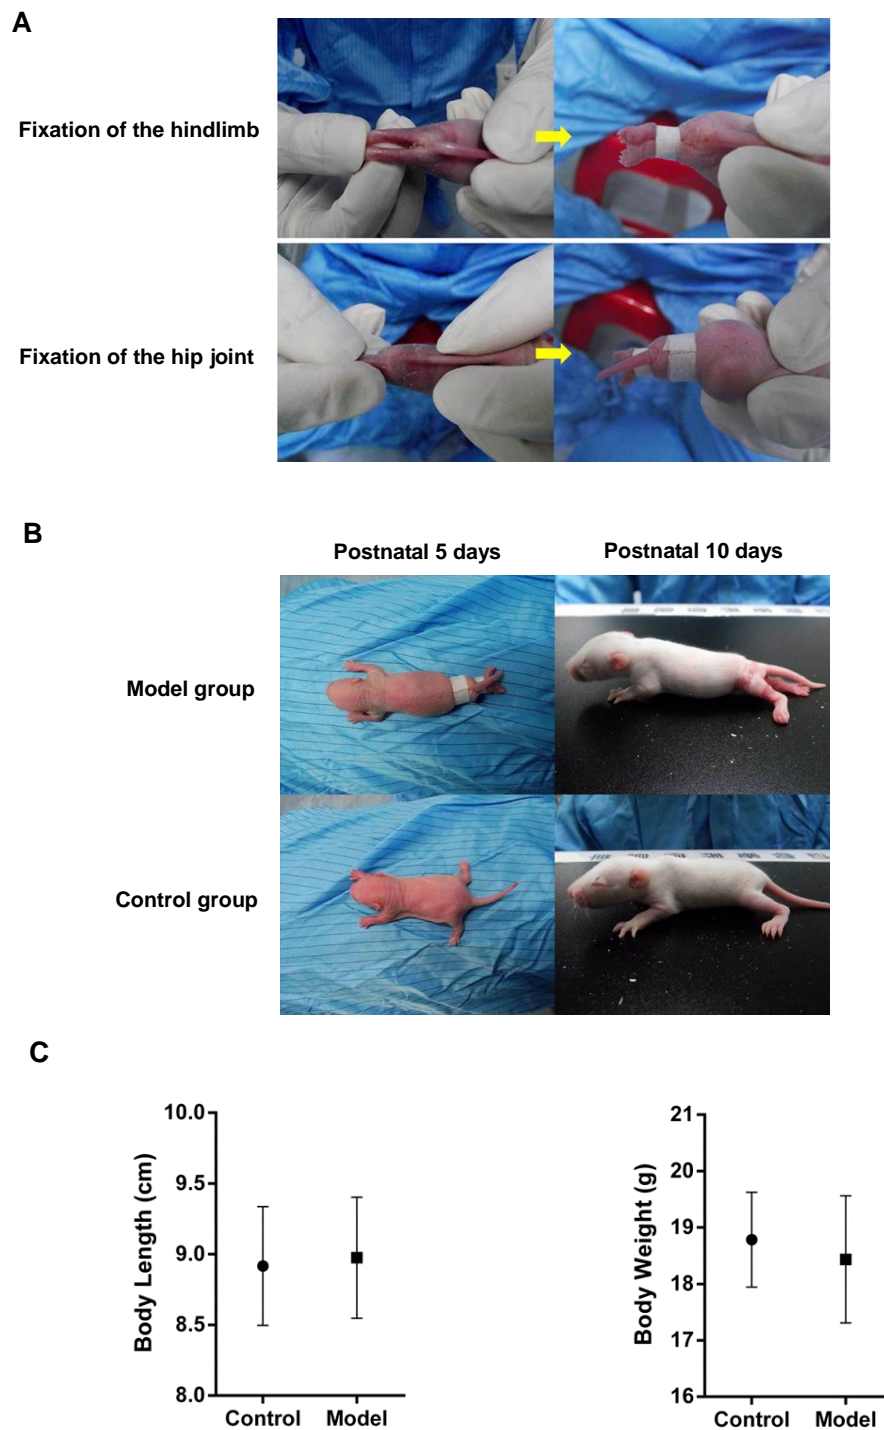

**Figure 1 Details of the DDH (straight-leg swaddling) model** (A) Representative images showing the methods to establish straight-leg swaddling model. (B) Representative images showing the appearances of the rats in model and control groups at postnatal 5 days and 10 days, respectively. (C) The body length and weight of the rats in model and control group, respectively.
